# Supplementary material for: Pesticide Use and Asthma in Alberta Grain Farmers
Source: MDPI journal article supplement (doi:10.3390/ijerph15030526), 2018-03-15
Supplement: s1 [file s1]

ID No.: \_\_\_\_\_

**Pesticides and Asthma Full Questionnaire**

Name of Farmer: \_\_\_\_\_

Address: \_\_\_\_\_

\_\_\_\_\_

Telephone Number: (\_\_\_\_\_) \_\_\_\_\_

\*\*\*\*\*

Name of Interviewer: \_\_\_\_\_

| <b>Date of Contact</b> | <b>Time of Contact</b> | <b>Outcome of Contact</b> |
|------------------------|------------------------|---------------------------|
|                        |                        |                           |
|                        |                        |                           |
|                        |                        |                           |
|                        |                        |                           |
|                        |                        |                           |
|                        |                        |                           |
|                        |                        |                           |
|                        |                        |                           |
|                        |                        |                           |

DATE OF INTERVIEW: \_\_\_\_\_

TIME INTERVIEW STARTED: \_\_\_\_\_

TIME INTERVIEW ENDED: \_\_\_\_\_



**INTRODUCTION**

Hello Mr/Mrs\_\_\_\_\_. My name is \_\_\_\_\_ and I am calling from the University of Alberta. You may remember, we mailed you a letter and information sheet about our study on Pesticide Use and the Health of Farmers a few weeks ago. You said you would be willing to take part and we would like to carry out the telephone interview with you now. This will take about 20 minutes. Is this a good time for you? Have you got the lists of pesticides previously sent with you now? I would just like to clarify that throughout the interview, when I say pesticides I am referring to insecticides, herbicides, and fungicides/seed treatments.

**Section A - Establishment of current status**

A1. Are you now working as a farmer?.....  Yes  
 No

A1a. Have you ever worked as a farmer? .....  Yes  
 No

A1b. If A1 or A1a is no, apologize and end the interview

A2. If ever worked as a farmer - have you ever worked as a farmer who grows grain and sells it commercially? .....  Yes  
 No

A2a. If no, what sort of farming have you mostly done? (*Record the answer below then apologize and end the interview*)

---

A3. Are you working now as a farmer who grows grain and sells it commercially? .....  Yes  
 No

A3a. If no, when did you last grow grain and sell it commercially? \_\_\_\_\_

---

**\*\*If A3 is no, go to question B1.\*\***

A4. If working as a grain farmer now, how many hours a week do you spend actively involved in growing and selling grain?

---

A4a. If less than 20 hours per week, in what year did you last work for as much as 20 hours a week in growing and selling grain?

---

**Section B**

**Interviewer:** Please document gender: Female  Male

**Questions B1-B6 - Ask all**

B1. How old were you on your last birthday? \_\_\_\_\_

B2. What grade did you complete in school? \_\_\_\_\_  
\_\_\_\_\_

B3. Have you ever attended lectures or taken courses of instruction dealing with the safe and proper use of pesticides? .....  Yes  
 No

B3a. If yes, in what year was the instruction taken? \_\_\_\_\_

B4. Have you attended university or taken university degree credit courses?..  Yes  
 No

B4a. If yes, how many years or courses have you completed? \_\_\_\_\_ years,  
\_\_\_\_\_

B5. How many years have you been working in agriculture since the age of 18 (do not include years of education as experience)?  
\_\_\_\_\_

B6. How many years have you been a farmer or farm operator since the age of 18 (with actual decision making responsibilities)?  
\_\_\_\_\_

**Questions B7-B10 - ask active farmers only**

**In this section - treat those currently working for 20 hours a week or less as not active**

**\*\* (If inactive farmer (if A3 is no or if A4a is less than 20 hours a week ) say: The next few questions are about the use of pesticides. Once again, I would like to remind you that when I mention pesticides, I am referring to insecticides, herbicides, and fungicides/seed treatments. - then go to question B11\*\***

B7. What is the total area of all land you currently operate (include all land owned, leased, or rented)?  
\_\_\_\_\_  
\_\_\_\_\_

B8. Approximately how many acres of the land that you currently farm was treated with herbicide in 2002?

---

**\*\* The next few questions are about the use of pesticides. Once again, I would like to remind you that when I mention pesticides, I am referring to insecticides, herbicides, and fungicides/seed treatments.\*\***

B9. In 2002, what percentage of your pesticide application was done by a custom applicator (include the work done by a neighbor or friend on an exchange bases)?

---

B10. During 2002 spraying season, did you experience what you believe to be symptoms of pesticide poisoning?.....  Yes  
 No

B10a. If yes, what symptoms did you experience?

---

---

---

B10b. How long were these symptoms experienced?

---

B10c. What pesticide or pesticides do you believe produced these symptoms?

---

---

**Questions B11-B15 - Ask all**

B11. In previous years, have you experienced what you believed to be symptoms of pesticide poisoning?.....  Yes  
 No  
 Not Sure

B11a. On how many separate occasions did you experience these symptoms?

---

B11b. What pesticide or pesticides do you believe caused these symptoms?

---

---

B12. Have you ever sought medical attention as the result of exposure to pesticides? .....  Yes  
 No

B12a. If **yes**, when you sought medical attention, did you receive what you consider to be adequate aid? .....  Yes  
 No  
 Not Sure

B13. Was there any particular reason for **NOT** seeking medical attention?

---

**\*\*If medical attention NOT sought because of never having symptoms of pesticide poisoning (B11) or from exposure to pesticides (B12), tick box .....**

B14. Do you believe that you have ever experienced long-term, lingering, or chronic health problems due to pesticide exposure over the years? .....  Yes  
 No  
 Not Sure

B14a. If **yes**, what health problems have you experienced?

---

---

---

B14b. Are you currently experiencing them? .....  Yes  
 No  
 Occasionally

B15. Have you ever experienced what you believe to be allergic reactions to pesticides? .....  Yes  
 No  
 Not Sure

B15a. If **yes**, what pesticide or pesticides do you believe produced these allergic reactions?

---

---

Questions B16-20 - ask active farmers only (*If inactive farmers (if A3 is no or if A4a is less than 20 hours a week) - go to question B21*)

In this section - treat those currently working for 20 hours a week or less as not active

B16. When you work with pesticides, do you wear any special clothing or pesticide safety equipment? .....  Yes  
 No

B17. What do you usually wear when opening containers or mixing pesticides?

---

---

B18. What do you usually wear on the tractor when applying pesticides in the field?

---

---

B19. What do you usually wear when mixing a seed treatment with your seed?

---

---

B20. Do you feel that pesticide safety equipment is too uncomfortable? .....  Yes  
 No

**Question B 21 - Ask all**

B21. Do you feel that pesticides are particularly harmful to your health? .....  Yes  
 No  
 Not Sure

**Section C - Lifetime history of pesticide use - Ask all**

**In this section, I am going to ask you about insecticides, then about herbicides, and finally about seed treatments. Thinking first about insecticides;**

C1. Looking back over your years in farming, what was the first year you were involved in the application of **insecticides** to crops or stock?

\_\_\_\_\_

C2. What was the last year you were involved in the application of **insecticides** to crops or stock?

\_\_\_\_\_

C3. Do you remember any years in which you did **not** use these **insecticides**?

\_\_\_\_\_

C4. In the course of a typical year, how many days did you use these **insecticides**?

\_\_\_\_\_ days

C4a. For how many hours each day? \_\_\_\_\_ hours

C5. When using these **insecticides**, did you use any equipment or clothing to stop you from breathing them in or to stop them from getting on your skin?.....  Yes  
 No

C5a. If **yes**, what did you use (*be specific - eg latex/cloth/rubber gloves*)?

\_\_\_\_\_  
\_\_\_\_\_

C6. Did you use **insecticides** in any other way around your house, yard (eg lawn), or garden? .....  Yes  
 No

C6a. What did you use? \_\_\_\_\_

C6b. For how many days per year? \_\_\_\_\_



C7. I will now go over the insecticide list previously sent to you. Please listen to this list of **insecticides** used in Alberta and identify what you use/used and when you used them. Indicate first year used, last year used, and the number of years used in total.

| Insecticide             | Calendar Year(s) | Insecticide               | Calendar Year(s) | Insecticide            | Calendar Year(s) |
|-------------------------|------------------|---------------------------|------------------|------------------------|------------------|
| Counter                 | F:<br>L:<br>T:   | Dylox                     | F:<br>L:<br>T:   | Premiere Plus Flowable | F:<br>L:<br>T:   |
| Cygon 4E                | F:<br>L:<br>T:   | Foundation Seed Treatment | F:<br>L:<br>T:   | Pyramin FL             | F:<br>L:<br>T:   |
| Cythion                 | F:<br>L:<br>T:   | Furadan                   | F:<br>L:<br>T:   | Pyrinex 480EC          | F:<br>L:<br>T:   |
| DB Green                | F:<br>L:<br>T:   | Hopper Stopper            | F:<br>L:<br>T:   | Sevin                  | F:<br>L:<br>T:   |
| Decis 5EC               | F:<br>L:<br>T:   | Lagon 480                 | F:<br>L:<br>T:   | Thimet                 | F:<br>L:<br>T:   |
| Decis Flowable          | F:<br>L:<br>T:   | Lindane                   | F:<br>L:<br>T:   | Vitavax Dual Solution  | F:<br>L:<br>T:   |
| Diazinon                | F:<br>L:<br>T:   | Lorsban 4E                | F:<br>L:<br>T:   | Vitavax RS Dynaseal    | F:<br>L:<br>T:   |
| Dibrom                  | F:<br>L:<br>T:   | Malathion 500             | F:<br>L:<br>T:   | Vitavax RS Flowable    | F:<br>L:<br>T:   |
| Dimethoate 480 Systemic | F:<br>L:<br>T:   | Matador 120EC             | F:<br>L:<br>T:   |                        |                  |

Others (please list any insecticides used not listed above)

| Insecticide | Calendar Year(s) | Insecticide | Calendar Year(s) | Insecticide | Calendar Year(s) |
|-------------|------------------|-------------|------------------|-------------|------------------|
|             |                  |             |                  |             |                  |
|             |                  |             |                  |             |                  |
|             |                  |             |                  |             |                  |

C8. What was the first year you were involved in the treating the land with **herbicides**?

\_\_\_\_\_

C9. What was the last year you were involved in the treating the land with **herbicides**?

\_\_\_\_\_

C10. Do you remember any years in which you did **not** use these **herbicides**?

\_\_\_\_\_

C11. In the course of a typical year, how many days did you use these **herbicides**?

\_\_\_\_\_ days

C11a. For how many hours each day? \_\_\_\_\_ hours

C12. When using these **herbicides**, did you use any equipment or clothing to stop you from breathing them in or to stop them from getting on your skin?.....  Yes  
 No

C12a. **If yes**, what did you use (*be specific - eg latex/cloth/rubber gloves*)?

\_\_\_\_\_  
\_\_\_\_\_

C13. Did you use **herbicides** in any other way around your house, yard (eg lawn), or garden? .....  Yes  
 No

C13a. What did you use? \_\_\_\_\_

C13b. For how many days per year? \_\_\_\_\_

C14. I will now go over the herbicide list previously sent to you. Please listen to this list of herbicides used in Alberta and identify what you use/used and when you used them. Indicate first year used, last year used, and the number of years used in total.

| Herbicide       | Calendar Year(s) | Herbicide     | Calendar Year(s) | Herbicide            | Calendar Year(s) |
|-----------------|------------------|---------------|------------------|----------------------|------------------|
| 2, 4-D Amine    | F:<br>L:<br>T:   | Eptam 8-E     | F:<br>L:<br>T:   | Prestige             | F:<br>L:<br>T:   |
| 2, 4-D LV Ester | F:<br>L:<br>T:   | Eradicane 8-E | F:<br>L:<br>T:   | Prevail              | F:<br>L:<br>T:   |
| Achieve         | F:<br>L:<br>T:   | Estoprop      | F:<br>L:<br>T:   | Puma One Pass        | F:<br>L:<br>T:   |
| Advance         | F:<br>L:<br>T:   | Estasol       | F:<br>L:<br>T:   | Puma Super           | F:<br>L:<br>T:   |
| Assert          | F:<br>L:<br>T:   | Excel         | F:<br>L:<br>T:   | Renegade             | F:<br>L:<br>T:   |
| Attain          | F:<br>L:<br>T:   | Fortress      | F:<br>L:<br>T:   | Rival                | F:<br>L:<br>T:   |
| Avadex BW       | F:<br>L:<br>T:   | Glyphos       | F:<br>L:<br>T:   | Roundup Fast Forward | F:<br>L:<br>T:   |
| Banvel          | F:<br>L:<br>T:   | Interprop     | F:<br>L:<br>T:   | Roundup Transorb     | F:<br>L:<br>T:   |
| Bonanza         | F:<br>L:<br>T:   | Laredo        | F:<br>L:<br>T:   | Rustler              | F:<br>L:<br>T:   |
| Buctril M       | F:<br>L:<br>T:   | Liberty       | F:<br>L:<br>T:   | Target               | F:<br>L:<br>T:   |
| Champion FM     | F:<br>L:<br>T:   | Lontrel 360   | F:<br>L:<br>T:   | Thumper              | F:<br>L:<br>T:   |
| Curtail M       | F:<br>L:<br>T:   | MCPA-Amine    | F:<br>L:<br>T:   | Touchdown            | F:<br>L:<br>T:   |
| Dichlorprop D   | F:<br>L:<br>T:   | MCPA-Ester    | F:<br>L:<br>T:   | Treflan              | F:<br>L:<br>T:   |
| Diphenoprop     | F:<br>L:<br>T:   | MCPA-K        | F:<br>L:<br>T:   | Triumph FM           | F:<br>L:<br>T:   |
| Dyvel           | F:<br>L:<br>T:   | Pardner       | F:<br>L:<br>T:   | Turboprop 600        | F:<br>L:<br>T:   |
| Edge            | F:<br>L:<br>T:   | Poast Ultra   | F:<br>L:<br>T:   | Victor               | F:<br>L:<br>T:   |

Others (please list any herbicides used not listed above)

| Herbicide | Calendar Year(s) | Herbicide | Calendar Year(s) | Herbicide | Calendar Year(s) |
|-----------|------------------|-----------|------------------|-----------|------------------|
|           |                  |           |                  |           |                  |
|           |                  |           |                  |           |                  |
|           |                  |           |                  |           |                  |

C15. What was the first year you were involved in **treating seed** (or handling seed that had already been treated)?

\_\_\_\_\_

C16. What was the last year you were involved in **treating seed** (or handling seed that had already been treated)?

\_\_\_\_\_

C17. Do you remember any years in which you did **not** use these **seed treatments**?

\_\_\_\_\_

C18. In the course of a typical year, how many days did you use these **seed treatments**?

\_\_\_\_\_ days

C18a. For how many hours each day? \_\_\_\_\_ hours

C19. When using these **seed treatment**, did you use any equipment or clothing to stop you from breathing them in or to stop them from getting on your skin? .....

Yes

No

C19a. If yes, what did you use(*be specific - eg latex/cloth/rubber gloves*)?

\_\_\_\_\_

\_\_\_\_\_

C20. Did you use **seed treatments** in any other way around your yard (eg lawn) or garden? .....

Yes

No

C20a. What did you use? \_\_\_\_\_

C20b. For how many days per year? \_\_\_\_\_

C21. I will now go over the seed treatment list previously sent to you. Please listen to this list of **seed treatments** used in Alberta and identify what you use/used and when you used them. **Indicate first year used, last year used, and the number of years used in total.**

| Seed Treatment            | Calendar Year(s) | Seed Treatment          | Calendar Year(s) | Seed Treatment      | Calendar Year(s) |
|---------------------------|------------------|-------------------------|------------------|---------------------|------------------|
| Benlate                   | F:<br>L:<br>T:   | N-M Dual                | F:<br>L:<br>T:   | Tilt 250EC          | F:<br>L:<br>T:   |
| Benlate Toss-N-Go         | F:<br>L:<br>T:   | N-M Drillbox            | F:<br>L:<br>T:   | Tuberseal           | F:<br>L:<br>T:   |
| Benolin-R                 | F:<br>L:<br>T:   | Polyram                 | F:<br>L:<br>T:   | Vitaflo 280         | F:<br>L:<br>T:   |
| DB Green                  | F:<br>L:<br>T:   | Premiere Plus Flowable  | F:<br>L:<br>T:   | Vitavax Dual        | F:<br>L:<br>T:   |
| Dithane DG                | F:<br>L:<br>T:   | Ridomil/Bravo Twin Pack | F:<br>L:<br>T:   | Vitavax Powder      | F:<br>L:<br>T:   |
| Foundation Seed Treatment | F:<br>L:<br>T:   | Ridomil MZ 72WP         | F:<br>L:<br>T:   | Vitavax Single      | F:<br>L:<br>T:   |
| Lindane                   | F:<br>L:<br>T:   | Ronilan                 | F:<br>L:<br>T:   | Vitavax RS Flowable | F:<br>L:<br>T:   |
| Manzate 200DF             | F:<br>L:<br>T:   | Rovral Flo              | F:<br>L:<br>T:   |                     |                  |
| Mertect                   | F:<br>L:<br>T:   | Thiram 75WP             | F:<br>L:<br>T:   |                     |                  |

Others (please list any seed treatments used not listed above)

| Seed Treatment | Calendar Year(s) | Seed Treatment | Calendar Year(s) | Seed Treatment | Calendar Year(s) |
|----------------|------------------|----------------|------------------|----------------|------------------|
|                |                  |                |                  |                |                  |
|                |                  |                |                  |                |                  |
|                |                  |                |                  |                |                  |

**Section D - Medical History and Current Health**

D1. Has a doctor ever told you that you had/have any of the following medical problems:

| <b>Problem</b>               | <b>Yes</b>               | <b>No</b>                | <b>Year and Details</b> |
|------------------------------|--------------------------|--------------------------|-------------------------|
| Diabetes                     | <input type="checkbox"/> | <input type="checkbox"/> |                         |
| Cancer                       | <input type="checkbox"/> | <input type="checkbox"/> |                         |
| Seizures                     | <input type="checkbox"/> | <input type="checkbox"/> |                         |
| Head injury/concussion       | <input type="checkbox"/> | <input type="checkbox"/> |                         |
| Thyroid trouble              | <input type="checkbox"/> | <input type="checkbox"/> |                         |
| Stroke                       | <input type="checkbox"/> | <input type="checkbox"/> |                         |
| Brain tumor                  | <input type="checkbox"/> | <input type="checkbox"/> |                         |
| Kidney disease               | <input type="checkbox"/> | <input type="checkbox"/> |                         |
| Allergies                    | <input type="checkbox"/> | <input type="checkbox"/> |                         |
| Arthritis                    | <input type="checkbox"/> | <input type="checkbox"/> |                         |
| Anaemia                      | <input type="checkbox"/> | <input type="checkbox"/> |                         |
| Heart problem                | <input type="checkbox"/> | <input type="checkbox"/> |                         |
| High blood pressure          | <input type="checkbox"/> | <input type="checkbox"/> |                         |
| Lead poisoning               | <input type="checkbox"/> | <input type="checkbox"/> |                         |
| Epilepsy                     | <input type="checkbox"/> | <input type="checkbox"/> |                         |
| Jaundice (hepatitis)         | <input type="checkbox"/> | <input type="checkbox"/> |                         |
| Other liver disease          | <input type="checkbox"/> | <input type="checkbox"/> |                         |
| Tuberculosis                 | <input type="checkbox"/> | <input type="checkbox"/> |                         |
| Other lung disease           | <input type="checkbox"/> | <input type="checkbox"/> |                         |
| Glandular fever              | <input type="checkbox"/> | <input type="checkbox"/> |                         |
| Psychiatric illness          | <input type="checkbox"/> | <input type="checkbox"/> |                         |
| Multiple sclerosis           | <input type="checkbox"/> | <input type="checkbox"/> |                         |
| ME/Chronic fatigue syndrome  | <input type="checkbox"/> | <input type="checkbox"/> |                         |
| Parkinson's disease          | <input type="checkbox"/> | <input type="checkbox"/> |                         |
| Fractures                    | <input type="checkbox"/> | <input type="checkbox"/> |                         |
| Osteoporosis                 | <input type="checkbox"/> | <input type="checkbox"/> |                         |
| Clots (deep vein thrombosis) | <input type="checkbox"/> | <input type="checkbox"/> |                         |
| Guillain-Barre Syndrome      | <input type="checkbox"/> | <input type="checkbox"/> |                         |
| Myasthenia gravis            | <input type="checkbox"/> | <input type="checkbox"/> |                         |

D2. Does your chest ever sound wheezy or whistling:

D2a. **when you have a cold?** .....  Yes  
 No

D2b. **occasionally apart from colds?** .....  Yes  
 No

D2c. **most days or nights?** .....  Yes  
 No

D3. If D2a, D2b, OR D2c yes, for how many years has this been present? \_\_\_\_\_  
 (Number of years)

**\*\*Ask all\*\***

D4. Have you ever had an attack of wheezing that has made you feel short  
 of breath? .....  Yes  
 No

D5. Has a doctor ever told you that you have asthma? .....  Yes  
 No

D5a. **If yes, how old were you when this was first diagnosed?** \_\_\_\_\_

D6. In the past month, have you been bothered at all by any of the following:

| Problem                                                      | Not at all               | Some what                | Severely                 |
|--------------------------------------------------------------|--------------------------|--------------------------|--------------------------|
| Difficulty concentrating                                     | <input type="checkbox"/> | <input type="checkbox"/> | <input type="checkbox"/> |
| Headaches                                                    | <input type="checkbox"/> | <input type="checkbox"/> | <input type="checkbox"/> |
| Feeling unhappy and depressed                                | <input type="checkbox"/> | <input type="checkbox"/> | <input type="checkbox"/> |
| Waking up tired and worn out                                 | <input type="checkbox"/> | <input type="checkbox"/> | <input type="checkbox"/> |
| Too little energy to do things                               | <input type="checkbox"/> | <input type="checkbox"/> | <input type="checkbox"/> |
| A poor memory                                                | <input type="checkbox"/> | <input type="checkbox"/> | <input type="checkbox"/> |
| Having to go back and check you have done things             | <input type="checkbox"/> | <input type="checkbox"/> | <input type="checkbox"/> |
| Difficulty in grasping what you read                         | <input type="checkbox"/> | <input type="checkbox"/> | <input type="checkbox"/> |
| Cramps or spasms in your muscles                             | <input type="checkbox"/> | <input type="checkbox"/> | <input type="checkbox"/> |
| The smell of paint, petrol or other chemicals                | <input type="checkbox"/> | <input type="checkbox"/> | <input type="checkbox"/> |
| Shortness of breath when walking with people of your own age | <input type="checkbox"/> | <input type="checkbox"/> | <input type="checkbox"/> |
| Sudden changes of mood                                       | <input type="checkbox"/> | <input type="checkbox"/> | <input type="checkbox"/> |



**Section E - Recent exposure to pesticides**

E1. Have you used / been exposed to **insecticides** in the past month?.....  Yes  
 No

E1a. If **yes**, what have you used? \_\_\_\_\_  
\_\_\_\_\_

E2. Do you think that any of the symptoms that you have experienced in the last month were due to this recent use of **insecticides**?.....  Yes  
 No

E2a. If **yes**, which symptoms?  
\_\_\_\_\_  
\_\_\_\_\_

E3. Have you used / been exposed to **herbicides** in the past month? .....  Yes  
 No

E3a. If **yes**, what have you used? \_\_\_\_\_  
\_\_\_\_\_

E4. Do you think that any of the symptoms that you have experienced in the last month were due to this recent use of **herbicides**?.....  Yes  
 No

E4a. If **yes**, which symptoms?  
\_\_\_\_\_  
\_\_\_\_\_

E5. Have you used / been exposed to **seed treatments** in the past month?...  Yes  
 No

E5a. If **yes**, what have you used? \_\_\_\_\_  
\_\_\_\_\_

E6. Do you think that any of the symptoms that you have experienced in the last month were due to this recent use of **seed treatments**? .....  Yes  
 No

E6a. If **yes**, which symptoms?  
\_\_\_\_\_  
\_\_\_\_\_

Section F - Future contact

F1. When we have completed the current study, we will be writing a report. Would you like us to send a summary of the findings? .....  Yes  
 No

F2. When we have these results, we may want to visit some of the farmers to carry out some simple health tests and to ask a few more questions.

Could we contact you again later if you are one of those chosen for this further study? .....  Yes  
 No

F3. Finally, is there anything else you would like to tell us about the use of pesticides and the way you think it can affect people's health?

---

---

---

---

---

---

---

---

---

---

---

---

---

---

---

---

---

---

---

---

---

---

---

---

**\*\*Thank you very much for taking part in this study. We are most grateful for your help.\*\***
